# Supplementary material for: Pioglitazone Metformin Complex Improves Polycystic Ovary Syndrome Comorbid Psychological Distress via Inhibiting NLRP3 Inflammasome Activation: A Prospective Clinical Study
Source: Hindawi journal article supplement (doi:10.1155/2020/3050487), 2020-04-28

**Supplementary Fig. 1** Expression levels of NLRP3 and caspase-1 in PBMC in patients with PCOS comorbid psychological distress (PPD)

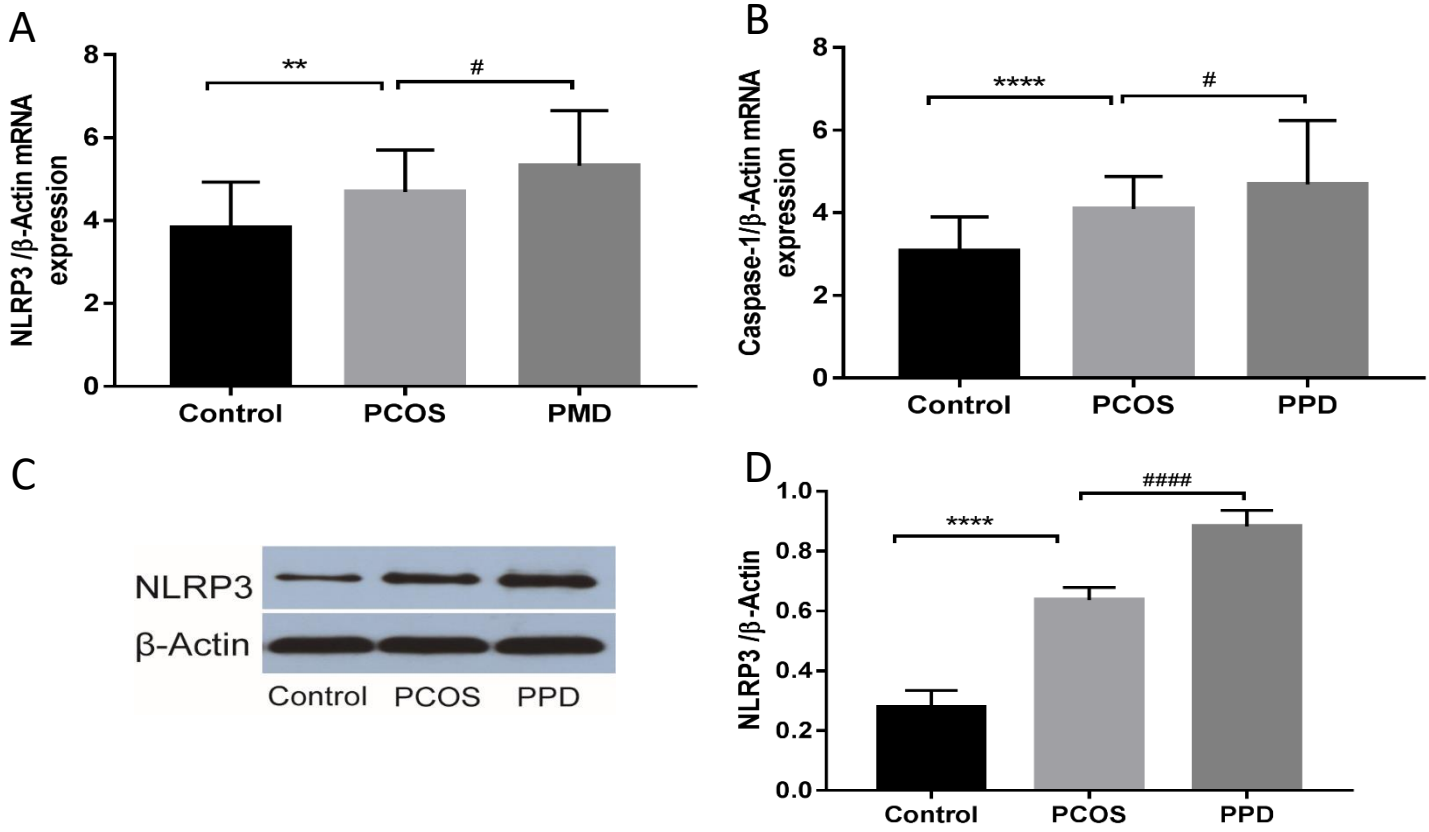

Supplement: f1 [file 3050487.f1.pdf]
